1

2 **Human Papillomavirus Type 16 L1/L2 VLP Experimental Internalisation by Human**  
3 **Peripheral Blood Leukocytes**

4

5 **Running Title:** HPV16 VLP internalisation in human leukocytes.

6

7 Aurora Marques Cianciarullo<sup>1,2#</sup>, Vivian Szulczewski<sup>1,2</sup>, Erica Akemi Kavati<sup>1,2</sup>, Tania  
8 Matiko Hosoda<sup>1,2</sup>, Elizabeth Leão<sup>4</sup>, Primavera Borelli<sup>5</sup>, Enrique Boccardo<sup>6</sup>, Martin Müller<sup>7</sup>,  
9 Balasubramanyam Karanam<sup>8</sup>, and Willy Beçak<sup>1,9</sup>

10

11 <sup>1</sup>Laboratory of Genetics, Butantan Institute, Secretary of State for Health, 1500 Dr Vital  
12 Brazil Avenue, Sao Paulo, SP 05503-900, Brazil.

13

14 <sup>2</sup>Program of Postgraduate Interunits in Biotechnology USP-IBU-IPT, Institute of  
15 Biomedical Sciences, University of Sao Paulo, 2415 Prof Lineu Prestes Avenue,  
16 Biomedical III Building, University City, Sao Paulo, SP 05508-900, Brazil.

17

18 <sup>3</sup>Program of Professional Upgrading at Butantan Institute, Secretary of State for Health,  
19 188 Dr Eneas de Carvalho Aguiar, Sao Paulo, SP 05403-000, Brazil.

20

21 <sup>4</sup>ELSME – Dr Elizabeth Leão Specialised Medical Services S/C Ltd., Sao Joaquim  
22 Hospital, Real and Meritorious Portuguese Beneficence Association, 694 Martiniano de  
23 Carvalho Street, Sao Paulo, SP 01321-000, Brazil.

24

25 <sup>5</sup>Laboratory of Experimental and Clinical Haematology, Department of Clinical and  
26 Toxicological Analyses, School of Pharmaceutical Sciences, University of Sao Paulo, 580  
27 B17 Prof Lineu Prestes Avenue, University City, Sao Paulo, SP 05508-900, Brazil.

28

29 <sup>6</sup>Laboratory of Oncovirology, Department of Microbiology, Institute of Biomedical  
30 Sciences, University of Sao Paulo, 1374 Prof Lineu Prestes Avenue, Biomedical II  
31 Building, University City, Sao Paulo, SP 05508-900, Brazil.

32

33 <sup>7</sup>Tumorvirus-specific Vaccination Strategies, Infection, Inflammation and Cancer Program,  
34 German Cancer Research Centre (DKFZ), 242 Im Neuenheimer Feld, Heidelberg 69120,  
35 Germany.

36

37 <sup>8</sup>Department of Pathology, Johns Hopkins University, Room 38, Cancer Research Building  
38 2, 1550 Orleans Street, Baltimore, MD 21231, USA.

39

40 <sup>9</sup>Department of Biology, Federal University of the Latin-America Integration – UNILA,  
41 1842 Silvio Americo Sasdelli Avenue, Vila A, Commercial Lorivo Building, Foz do  
42 Iguaçu, PR 85866-000, Brazil.

43

44 **#Corresponding author:** Aurora M. Cianciarullo, Laboratory of Genetics, Butantan  
45 Institute, 1500 Dr Vital Brazil Avenue, Sao Paulo, SP 05503-900, Brazil, phone +5511  
46 26279725, fax +5511 26279714, email: [aurora.cianciarullo@butantan.gov.br](mailto:aurora.cianciarullo@butantan.gov.br)

47

48 **Footnote:** B.K. present addresses Department of Biology and Cancer Research, 1200 W.  
49 Montgomery Road, Tuskegee University, Tuskegee, AL 36088, USA.

50

51 **Keywords:** HPV16 L1/L2 VLP, HPV internalisation by lymphocytes, HPV membrane  
52 receptors, cancer risk factor, public health.

53

54 **Grant support:** This work was supported by grants from the Foundation for Research  
55 Support of the State of Sao Paulo – FAPESP (Process number 2004/15122-5), Butantan  
56 Institute and Butantan Foundation, Sao Paulo, SP, Brazil.

57

58 **Conflicts of interest:** The authors disclose no potential conflict of interest with the  
59 publication of this article.

60

61 **Authors email:** [aurora.cianciarullo@butantan.gov.br](mailto:aurora.cianciarullo@butantan.gov.br), [emefjmlisboa@prefeitura.sp.gov.br](mailto:emefjmlisboa@prefeitura.sp.gov.br),  
62 [erica.kavati@butantan.gov.br](mailto:erica.kavati@butantan.gov.br), [hosodatania@yahoo.com.br](mailto:hosodatania@yahoo.com.br), [eleao@ibest.com.br](mailto:eleao@ibest.com.br),  
63 [borelli@usp.br](mailto:borelli@usp.br), [eboccardo@usp.br](mailto:eboccardo@usp.br), [martin.mueller@dkfz.de](mailto:martin.mueller@dkfz.de),  
64 [bkaranam@mytu.tuskegee.edu](mailto:bkaranam@mytu.tuskegee.edu), [wbecak@yahoo.com](mailto:wbecak@yahoo.com)

65

66

67

68

69

70

71

72 **ABSTRACT**

73 Human papillomavirus (HPV) accounts for hundreds of thousands of new cases of cervical  
74 cancer yearly, and half of these women die of this neoplasia. This study investigates the  
75 possibility of HPV16 to infect human peripheral blood leukocytes in *ex vivo* assays. We  
76 have developed a leukocyte separation method from heparinized blood samples aiming  
77 cellular integrity and viability. We have expressed humanized L1 and L2 viral capsid  
78 proteins in HEK293T epithelial human cells, transiently transfecting them with vectors  
79 encoding humanized HPV L1 and L2 genes. Recombinant L1/L2 capsid proteins and  
80 structured virus-like particles interacted with human peripheral blood mononuclear cells –  
81 lymphocytes and monocytes – and were internalised through a pathway involving CD71  
82 transferrin receptors. This was observed, at a percentile of about 54% T-CD4, 47% T-CD8,  
83 48% B-CD20, and 23% for monocytes-CD14. The group of polymorph nuclear cells:  
84 neutrophils-eosinophils-basophils group did not internalise any VLPs. Blockage assays  
85 with biochemical inhibitors of distinct pathways, like chlorpromazine, rCTB, filipin,  
86 nystatin, liquemin, and sodium azide also evidenced the occurrence of virus-like  
87 particles' indiscriminate entrance via membrane receptor on mononuclear cells. This study  
88 shows that HPV16 L1/L2 VLPs can interact with the plasma membrane surface and  
89 successfully enter lymphocytes without requiring a specific receptor.

90

91 **IMPORTANCE**

92 Human papillomaviruses (HPVs) belong to the *Papillomaviridae* family and are classified  
93 in Alpha papillomavirus, Beta papillomavirus, Gamma papillomavirus, and Mu  
94 papillomavirus genera, based on DNA sequence of the L1 gene. They are associated with  
95 the development of benignant skin warts, cell transformation and malignant tumours. L1 is

96 its major capsid protein, and L2 is the minor HPV capsid protein. HPV type 16 is  
97 considered a high-risk Alpha papillomavirus due to the association with 50% of cervical  
98 cancers worldwide. The most frequent HPV-associated cancer type is cervical cancer, but  
99 etiological association has also been demonstrated for carcinomas of the penis, vulva,  
100 vagina, anus and oropharynx – including base of the tongue and tonsils – regions. This  
101 study indirectly investigates the possibility of HPV16 to infect other cell types *in vitro*,  
102 particularly human peripheral blood leukocytes.

103

## 104 **INTRODUCTION**

105 In 1974, zur Hausen's researches pointed to the HPV as the major aetiological agent in  
106 cervical cancer and, later, its DNA was detected in tumours found in other anogenital  
107 regions (1-3). Today, there are more than 200 different types of well characterized HPVs,  
108 of which approximately 40 types infect the genital tract. The most frequently found are  
109 types 6 and 11 that induce benign skin warts formation, and types 16 and 18 which are  
110 associated to cancer development. There are at least 12 HPV types that according to the  
111 Agency for Research on Cancer (IARC) are considered oncogenic to humans (4,  
112 Papillomavirus Episteme (PaVE); <http://pave.niaid.nih.gov/#home>). Among them, HPV16  
113 and HPV18 are those responsible for approximately 70% of all cervical cancers (4, 5). In  
114 2025, the projected global estimate of cervical cancer is expected to rise to 720,415 new  
115 cases per year, and it is expected that half of these women will die of this neoplasia (5).  
116 However, the difficulty to obtain enough viable wild types or recombinant HPV particles  
117 has limited researches to distinct aspects of virus biology (6). All viruses enter host cells to  
118 survive, replicate and evade the immune system. So far, the entry of HPV and its traffic  
119 through the host cells are still not completely elucidate (7). Several studies describe this

120 process like a complex set of interactions among different pathways, receptors, co-receptors  
121 and co-factors. In keratinocytes, HPV seems to be internalised via clathrin-dependent  
122 endocytic mechanisms, but it might use alternative uptake pathways to enter cells, such as a  
123 caveolae-dependent route, among others depending on viral type (6-9).

124 Currently, HPV is recognised as one of the main causes of infection-related cancer  
125 worldwide, as well as the causal factor of other diseases. Infection with high-risk HPV  
126 types is the aetiological cause of cervical cancer and is strongly associated with a  
127 significant fraction of penile, vulvar, vaginal, anal and oropharyngeal cancers (10, 11).  
128 HPVs are responsible for approximately 88% of anal cancer and 95% of anal intraepithelial  
129 neoplasia grades 2/3 lesions, and 40%-50% of penis and vulvar cancers (10). In  
130 oropharyngeal cancers, HPV DNA was detected in 35%-50% cases (10). In all HPV-  
131 positive non-cervical cancers, HPV16 is the most common HPV type detected, followed by  
132 HPV types 18, 31, 33 and 45. Among the non-cancerous HPV-associated conditions,  
133 genital warts and recurrent respiratory papillomatosis are surely linked to HPV6 and 11  
134 (10). In addition, it was demonstrated recently that HPV16 virus-like particles (VLPs)  
135 L1/L2 interact with haematopoietic precursor stem cells, present in the amniotic fluid from  
136 healthy pregnant women (12). Whereas new pathologies are increasingly being associated  
137 to the HPVs; the responsibility and costs of HPV-associated diseases and cancer remain an  
138 important public health issue in all countries, regardless of their economic developmental  
139 level (13). Due to the continuous worldwide propagation of HPV it is necessary to  
140 investigate the possibility of HPV internalisation by different human cell types. In the  
141 present study, we addressed the capacity of HPV16 L1/L2 VLP entrance/uptake of – in  
142 peripheral blood leukocytes *in vitro*.

143

## 144 **MATERIAL AND METHODS**

### 145 **Production of HPV16 L1/L2 VLPs**

146 The production of VLPs was carried out throughout the recombinant protein expression  
147 HPV16 L1 and L2 in epithelial human cells of the HEK293T lineage, cultured as  
148 previously described (14). Transfection of these cells occur in a transient way using  
149 pUF3L1h and pUF3L2h vectors, which are regulated by the human cytomegalovirus  
150 promoter containing complete sequences of genes L1 and L2 – a method already described  
151 in detail (14, 15). In this study, besides being used to produce VLPs containing both capsid  
152 proteins, HEK293T cell line was also used as a control factor on interaction assays with  
153 human peripheral blood leukocytes. All assays performed in this study were analysed in  
154 duplicate, being representative of at least four independent tests.

155

### 156 **Blood collection**

157 Blood samples from 10 healthy female volunteers, ages ranging from 35 to 55, were  
158 requested based on epidemiological data associated with genital HPV infection (16). The  
159 screening of the volunteers was based on recent blood, Pap smears and colposcopy tests  
160 and on data filled out by the candidate on a written informed consent form and on a  
161 questionnaire, for the purpose of laboratory research. Volunteers who did not present Pap  
162 and colposcopy results within reference values were dismissed. Blood samples were  
163 collected in sterile tubes containing heparin – for interaction assays with leukocytes – and  
164 EDTA – for blocking assays – , and were processed quickly, within a maximum of 2-hours  
165 after collection. During this interval, they were stored at 4°C.

166

### 167 **Leukocytes' separation**

168 Whole blood was collected in heparin at a concentration of 0.1 mg/ml, centrifuged at 1,000  
169 rpm for 7 minutes at 5°C in a Sorvall® RT 6000 Refrigerated Centrifuge (Du Pont,  
170 Wilmington-DE, USA) with a horizontal angle rotor. The plasma supernatant containing  
171 platelets and leukocytes was gently removed and transferred with the aid of a Pasteur  
172 pipette to a new tube. An aliquot was collected for total and differential counts, performed  
173 in a Neubauer chamber, diluted (ratio 1:1) in Trypan blue and smears were stained by May-  
174 Grünwald-Giemsa in order to determine their composition. Leukocytes sedimented were  
175 centrifuged again at 1,200 rpm, for 3 minutes, at 5°C, to remove platelets. Leukocytes  
176 precipitates were resuspended in 0.85% saline solution for subsequent tests (17). The  
177 Neubauer chamber counts and smears containing distinct cell types were analysed by light  
178 microscopy, with a Leica DMIL I microscope (Leica Microsystems GmbH, Vienna, AUT).

179

#### 180 **Interaction assays of HEK293T cells and HPV16 L1/L2 VLPs**

181 HEK293T cells ( $2 \times 10^4$  cells/ml) were plated and maintained under growth conditions,  
182 washed with PBS and incubated with 120 µg of VLPs in DMEM without FBS, for 4-hours  
183 at 37°C and 5% CO<sub>2</sub>. After this, cells were washed twice with PBS for 3 minutes each in  
184 order to remove non-interactive particles. Cells were then fixed with 2% PFA  
185 (Paraformaldehyde, Sigma-Aldrich) in PBS for 1-hour, at 4°C, and washed three times with  
186 PBS, 5 minutes each. Plates were kept at 4°C until immunofluorescence assays. Controls  
187 were performed in the absence of VLPs and/or the denaturation thereof, by heating at  
188 100°C for 10 minutes (18, adapted).

189

#### 190 **Interaction assays of human leukocytes and HPV16 L1/L2 VLPs**



191 Leukocytes ( $2 \times 10^4$  cells/ml) of healthy volunteers were incubated with 120  $\mu\text{g}$  of VLPs  
192 produced in this study and RPMI without FBS for 4-hours at  $37^\circ\text{C}$  and 5%  $\text{CO}_2$ , under  
193 gentle agitation. Cells were centrifuged at 1,000 rpm for 7 minutes and cell pellets washed  
194 three times with PBS, 5 minutes each. Then, cells were fixed with 2% PFA in PBS for 1-  
195 hour, at  $4^\circ\text{C}$ . After this step, the centrifugation and PBS washing processes were repeated.  
196 Samples were kept at  $4^\circ\text{C}$  until immunofluorescence assays. Controls were the same as  
197 described above for HEK293T cells.

198

### 199 **Interaction assays of leukocytes, transferrin and HPV VLPs**

200 The same protocol described above was employed, with minor changes described below.  
201 Leukocytes were incubated with 120  $\mu\text{g}$  of VLPs in separate samples, as follows: the  
202 HPV16 L1/L2 VLPs produced in this study, and L1 VLPs of HPV6, 11, 16 and 18 from  
203 Gardasil<sup>®</sup> vaccine, used as control, kindly provided by Merck Sharp & Dohme. RPMI  
204 without FBS, together with transferrin (Tf) conjugated to fluorochrome TexasRed<sup>®</sup>  
205 (Molecular Probes<sup>™</sup>), were added (ratio 1:60, Tf:RPMI). Samples were kept for 15, 45, 60  
206 and 120 minutes in an incubator at  $37^\circ\text{C}$  and 5%  $\text{CO}_2$ , under gentle agitation. The other  
207 procedures remained unchanged.

208

### 209 **Blocking assays for membrane receptors**

210 Leukocytes of healthy donors were counted and incubated in RPMI medium overnight over  
211 coverslips containing poly-L-lysine (Sigma-Aldrich), at  $37^\circ\text{C}$  and 5%  $\text{CO}_2$ . Then, cells  
212 were washed and a fresh medium was placed together with specific biochemical inhibitors  
213 of ligand uptake (Table 1), used isolated or associated, and incubated for 2 hours (18). After  
214 incubation, cells were washed and 120  $\mu\text{g}$  of HPV16 L1/L2 VLPs (19) were added and

215 incubated with medium for 4 hours. Cells were washed again and fixed in 2% PFA  
216 solution. Immunofluorescence assays were carried out to detect the VLP-PBMC interaction  
217 by confocal microscopy, using specific antibodies to recognise L1 and L2 proteins. Z-axis  
218 3D images were obtained to confirm the presence of VLPs within cells.

219

## 220 **Immunofluorescence assays for internalisation analysis**

221 Leukocytes were washed and fixed as already described. Samples were incubated in PBS  
222 containing 1% BSA for 5 minutes under gentle agitation. Later, cells were incubated with  
223 the primary antibodies (suppl. Data – Table 1); diluted in PBS containing 0.01% Tween<sup>®</sup>  
224 20 and 0.5% BSA – pH 8 – for 2 hours, under gentle agitation, at room temperature. They  
225 were then washed three times with PBS for 10 minutes each, followed by incubation with  
226 the corresponding secondary antibodies (suppl. Data – Table 2); conjugated with  
227 fluorochromes; and diluted in PBS containing 0.01% Tween<sup>®</sup> 20 and 1.5% BSA for 1 hour,  
228 under light stirring, at room temperature. Once more, they were washed three times with  
229 PBS for 10 minutes each. Samples of leukocytes with transferrin and VLPs were labelled  
230 with Phalloidin conjugated AlexaFluor<sup>®</sup> 594, incubated for 20 minutes. Immediately after  
231 that, they were rinsed twice with PBS for 10 minutes each. Aliquots of cell suspension from  
232 both items assayed were adhered over silanized slides, and mounted with 5 µl Mowiol<sup>®</sup> and  
233 coverslips. Samples were kept at 4°C until CLSM analysis, using Confocal Laser Scanning  
234 Microscope Zeiss 510 Meta of the Butantan Institute (FAPESP Process No. 2000/11624-5;  
235 Carl Zeiss GmbH, Jena, DEU).

236

## 237 **RESULTS**

### 238 **Leukocytes' identification**

239 After isolation of leukocytes from healthy donors, control smears stained by May-  
240 Grünwald-Giemsa method showed cell morphology preservation (17), presenting a positive  
241 correlation with the control blood smears. Counts indicated approximately 98%  
242 lymphocytes; 0.7% monocytes; 1.5% polymorph nuclear cells; 0.1% red blood cells and  
243 0.1% platelets. The ultrastructure was well preserved for all cell types analysed, with well-  
244 defined and intact membranes (17). The efficiency and speed of the method for obtaining  
245 leukocytes, preserving morphology and cell viability was confirmed.

246

#### 247 **Analysis of interaction between HEK293T cells and HPV16 L1/L2 VLPs**

248 HEK293T cells interaction with HPV16 L1/L2 VLPs was analysed by  
249 immunofluorescence. We emphasize that the genome of this cell line does not contain any  
250 HPV DNA sequences, but it contains Adenovirus DNA and SV40 T-Ag. After 4-hours at a  
251 37°C interaction, cells were washed in order to remove any particles or proteins that did not  
252 interacted with HEK293T cells. Then, cells were fixed and stained with the primary  
253 antibody Camvir-1 (BD Biosciences – suppl. Data – Table 1) for L1 proteins and with L1  
254 conformation-specific anti-VLP antiserum (Biodesign – suppl. data – Table 1). It was  
255 therefore possible to observe the internalisation of VLPs in some cells. In these cells VLPs  
256 were found in the cytoplasm, near the core region (suppl. data – Img. 1 A-D), stained with  
257 anti-VLP. These results were confirmed by the overlap of images (suppl. data – Img. 1 A  
258 and C), and by the most thoroughly detailed internalisation display on the Z-axis scanning  
259 sections (suppl. data – Img. 1 B and D). The morphological evaluations show that probably  
260 the VLPs' internalisation occurs simultaneously with a large number of particles, similar to  
261 the formation of endocytic vesicle structures (suppl. data – Img. 1 C, white arrow). These  
262 results suggest that after 4 hours, structured VLPs (suppl. data – Img. 1 A-D), as well as

263 non-structured VLPs – such as pentameric and monomeric forms of L1 stained with  
264 Camvir-1 (suppl. data – Img. 1 E) – , were internalised in epithelial cells from the human  
265 kidney (HEK293T), across the cell membrane (suppl. data – Img. 1 B and D). The negative  
266 controls showed no immunostaining for L1 and VLPs and no changes in cell morphology  
267 were detected (suppl. data – Img. 2).

268

### 269 **Analysis of interactions between human leukocytes and HPV16 L1/L2 VLPs**

270 L1/L2 particles were added to human leukocytes, for 4-hours at 37°C, and prepared for  
271 indirect CLSM immunofluorescence analysis, in order to investigate the possibility of  
272 interaction between the leukocytes and the HPV16 L1/L2 VLPs. Results indicate an  
273 interaction of VLPs with peripheral blood mononuclear cells (PBMC) – T and B  
274 lymphocytes and monocytes – from healthy women volunteers (Fig. 1). Structured HPV16  
275 L1/L2 VLPs also interacted with and were internalised by leukocytes (Figs. 2 and 3). After  
276 4-hours of interaction, in most leukocytes examined, these particles were found in the cell  
277 cytoplasm, as was the case with HEK293T. These results were confirmed by the images’  
278 overlap (Figs. 1 A, B and D; Figs. 2 and 3), and the detailed internalisation, as shown on  
279 the Z-axis scanning sections (Fig. 2 C). Fig. 1 C (green arrow) shows VLPs across the cell  
280 membrane. The Z-axis’ sweep cuts were able to demonstrate the internalisation of the VLP  
281 with a larger number of particles similar to the formation of endocytic vesicles structures  
282 (Fig. 2 A, white arrow), like those found in HEK293T cells (suppl. data – Img. 1 C, white  
283 arrow), a phenomenon endorsed by morphological evaluations. In Fig. 3, the interaction of  
284 leukocytes with the VLPs is illustrated, showing the colocalisation of HPV16 L1/L2  
285 proteins recognised by anti-L1 (green) and anti-L2 (red), respectively. This colocalisation  
286 was expected in VLPs that are composed of these two proteins, as it might be seen from the

287 images' overlap (Fig. 3). Fig. 3 B shows the internalisation of VLPs by leukocytes in a  
288 significant amount when compared to other interactions. At least 15 fields were analysed  
289 per experiment, containing from 4 to 10 cells per field. The presence of structures similar to  
290 vacuoles can also be observed (Fig. 3 B, blue arrow). Control assays showed no  
291 immunostaining, neither with the antibodies used to detect L1 and L2 separately, nor with  
292 structured HPV16 L1/L2 VLPs (suppl. data – Img. 3).

293

#### 294 **Identification of human PBMC interactions with VLPs**

295 These cells were treated with antibodies in order to recognise specific cell membrane  
296 receptors for each type (suppl. data – Table 1), and analysed by indirect  
297 immunofluorescence using CLSM to identify PBMC interactions with HPV16 VLPs, after  
298 4-hours incubation at 37°C. HPV16 VLPs interacted with *ex vivo* PBMC (Figs. 4-6). These  
299 results were confirmed by the images' overlap (Figs. 4 and 5) and displayed detailed  
300 internalisation on the Z-axis sections (Fig. 6). T and B lymphocytes showed greater  
301 competence to internalise VLPs, at around 47%-52% of cells (Table 2). Through  
302 morphological assessments, T-lymphocytes that internalised VLPs and were recognised by  
303 anti-CD8 showed endocytic vesicles-like structures (Fig. 4 B, white arrow). Only 23% of  
304 monocytes that were identified by anti-CD14 antibody interacted with the VLPs (Table 2).

305

#### 306 **Analysis of the colocalisation of VLPs and transferrin (Tf) in human PBMC**

307 After 15 minutes, no colocalisation between L1 VLPs and exogenous Tf was detected  
308 (Fig.7). Moreover, it was possible to show the internalisation of VLPs during this period.  
309 After 45 minutes, colocalisation of VLPs with exogenous Tf in the cytoplasm of human  
310 PBMC (Fig. 8 and 9, yellow arrows), and also with the TfR or CD71, was observed (Fig. 9

311 A-B, yellow arrows) suggesting that the iron pathway may be used to HPV internalisation.  
312 All results were confirmed by the images' overlap, respectively (Figs. 7-9).  
313 We compared the kinetics of internalization of Tf and TfR (CD71) with the colocalisation  
314 of HPV16 L1/L2 VLPs produced in this study and with control HPV6, 11, 16, 18 L1 VLPs  
315 derived from the Gardasil<sup>®</sup> vaccine (Fig. 10). After only 15 minutes of interaction it was  
316 possible to observe colocalisation of TfR and Tf (Fig. 10 A-B, purple arrows) with both  
317 L1/L2 VLPs (Fig. 10 A) as well as with Gardasil L1 VLPs (Fig. 10 B). By means of  
318 morphological analysis, we were able to demonstrate the colocalisation of both VLPs – L1  
319 and L1/L2 – with Tf and TfR in the leukocytes' cytoplasm, after a 45-minutes interaction  
320 period (Fig. 10 C-D, white arrows). This colocalisation among VLPs, Tf and TfR was  
321 found in approximately 50% of analysed cells. Within 60 minutes of interaction, we  
322 observed a feeble colocalisation between Tf and VLPs in about 30% of the cells (Fig. 10 E-  
323 F, orange arrows). No colocalisation was observed in the tests after 120 minutes. The  
324 colocalisation was evidenced in detail by three-dimensional figures stacked in Z-axis  
325 (Fig. 10). The negative controls showed no signs of L1 and VLPs. However, it was possible  
326 to observe exogenous Tf internalisation (suppl. data – Img. 4). Comparative testing of  
327 L1/L2 VLPs produced in this study and of control L1 VLPs from Gardasil<sup>®</sup> vaccine  
328 showed no significant differences in the analysed results.

329

### 330 **Analysis of the blocking assays of PBMC membrane receptors**

331 After successful identification of VLPs within leukocytes and their colocalisation with Tf  
332 and TfR, a variety of biochemical inhibitors, known to inhibit distinct cellular processes,  
333 was used to demonstrate the involvement of these and other different pathways of VLPs  
334 entry in PBMC.

335 Chlorpromazine inhibits clathrin-mediated endocytosis of various plasma membrane  
336 proteins. Nystatin is a sterol-binding agent that disassembles caveolae in the membrane.  
337 rCTB (Clostridium toxin B) acts by shortening the actin filaments' length, by inhibiting its  
338 process *in vitro*. Liquemin is related with the VLPs obstruction of internalisation through  
339 the HSPG (Heparan sulphate proteoglycans) pathway. Sodium azide is an ATPase  
340 inhibitor, which blocks particle movement towards the cell body and leads to a diffuse  
341 random movement.

342 The use of these different biochemical inhibitors was not sufficient to block the HPV16  
343 L1/L2 VLPs entry in the PBMC (Figs. 11-12). Chlorpromazine – although known for  
344 blocking the clathrin pathway through CD71 receptor of Tf – was not able to inhibit VLPs  
345 entrance inside PBMC in a satisfactory manner. The same occurred when rCTB, Filipin and  
346 Nystatin, Liquemin and Sodium azide were used to block actin-dependent cell processes,  
347 the caveolae pathway, the HSPG pathway, and endocytic pathways, respectively, either  
348 assayed separately or associated in an all-inhibitors cocktail. These results suggest that  
349 PBMC makes use of multiple internalisation pathways to uptake HPV16 particles.

350

## 351 **DISCUSSION**

352 Differently of many Beta and Gamma papillomavirus, Alpha papillomaviruses developed  
353 immune system evasion strategies from the host, causing persistent and visible papillomas,  
354 which sometimes evolving to cancers (20). Some HPV types including 16, 18, 31, 33, 35,  
355 39, 45, 51, 52, 56, 58 and 59 have been classified as human carcinogens by the IARC,  
356 being responsible for at least 4% of all human malignancies (4, 21, Papillomavirus  
357 Episteme (PaVE); <http://pave.niaid.nih.gov/#home>). Infection by high-risk HPV types is  
358 the major factor for the development of cervical cancer, and HPV DNA is also found in

359 tumours affecting other anogenital regions. Besides, they are being correlated with an  
360 increasing proportion of oropharyngeal squamous cells carcinomas, and occurrences  
361 affecting mainly tonsil and base of tongue regions are currently being documented in  
362 particular geographic areas (22). A study describes women who have never experienced  
363 sexual intercourse as having genital lesions caused by HPV, showing that, in addition to  
364 sexual transmission, could have other forms of infection such as fomites and skin contact,  
365 and maternal-foetal vertical transmission is also being considered as a probable infection  
366 pathway (23-27).

367 Cell-virus interaction is the initial step in viral infection. Often, virus adsorption occurs on  
368 the plasma membrane of susceptible cells. In general, the most common solution is that the  
369 pathogen's intracellular trafficking occurs through an existing entry mechanism, mediated  
370 via clathrin, caveolin, macropinocytosis, among others, moving inside cells to reach the  
371 location where viral replication occurs (28). Transcytosis is used to move antigens and  
372 protective antibodies across epithelial barriers. Similar to what seems to occur with HIV  
373 (29), the transcytosis of HPV through epithelial cells, crossing cellular barriers, should also  
374 be dependent on trafficking to the endocytic recycling pathway. The productive life cycle  
375 of HPV is directly linked to epithelial differentiation. It is believed that the papillomavirus  
376 is capable of maintaining the expression of structural genes, under tight control of the  
377 regulatory mechanisms of transcription and translation (30). The L1 capsid protein of HPV,  
378 regardless of the presence or absence of L2, has the property of forming structures that  
379 mimic morphologically authentic virions, VLPs, which are being used as replacements for  
380 HPV infected cell culture *in vitro* (8, 14, 31, 32). However, the presence of L2 seems to  
381 confer greater stability to the virus and VLP, therefore, the viral capsid indeed seems to  
382 contribute to the virus' infectivity (33). Most experimental models explore the process of



383 host cell interaction by molecular or biochemical methods, using cell lines from different  
384 tissues and species in interactions with HPV L1 VLPs in their studies.

385 In the present work, we produced HPV L1/L2 VLPs (14, 15) to investigate the possibility  
386 that these particles interact with human leukocytes, in order to understand possible  
387 mechanisms involved in these interactions. We have developed a method for the isolation  
388 of these cells (17), used in suspension at 37°C, thereby creating an *ex vivo* system as closely  
389 as possible to the natural conditions of HPV16 infection, thus conceiving a novel  
390 experimental model.

391 HPV16 recombinant proteins L1, L2 and VLPs were visualized in the perinuclear region of  
392 HEK293T cells, in compliance with data described in the literature (34). The presence of  
393 BPV (bovine papillomavirus) in lymphocytes has been discussed (35, 36). Using PCR  
394 technique (Polymerase Chain Reaction) in samples taken from humans with anogenital  
395 lesions, the presence of HPV16 in peripheral blood samples (37) and in plasma cells (38)  
396 was detected. Besides, DNA of other HPV types has been found in PBMC (39, 40). The  
397 presence of HPV in lymphocytes of patients treated for anogenital cancers suggests that the  
398 virus can remain in these cells even after treatment. However, there are no convincing  
399 evidences that support that lymphocytes carry/produce infectious HPV viral particles.

400 Nonetheless, the presence of HPV macromolecules in lymphocytes may play a role in viral  
401 immune response.

402 The scientific literature discloses that papillomavirus exhibits specific tropism for species  
403 and tissues. However, BPV1 particles, isolated from bovine warts, and HPV16 VLPs  
404 interacted successfully with 14 cell lines derived from different species and tissues, as  
405 demonstrated in two different studies (32, 41). Using our model to investigate this, HPV16  
406 L1/L2 VLPs interacted *in vitro* and *ex vivo* with two very distinct human cells, epithelial

407 kidney cells and PBMC, respectively. After 4 hours of interaction, these particles'  
408 internalisation occurred, showing a very similar distribution pattern on both cell types. In  
409 both, L1 VLPs were located in the cytoplasm near the nucleus, suggesting that tissue  
410 differences do not affect the ability of HPV16 VLPs to entry in different cell types, and that  
411 pentameric and monomeric forms of L1 may also be internalised. The interaction between  
412 VLPs and monocytes observed in this study showed colocalisation with CD14. As  
413 macrophage precursors, apparently these cells are able to internalise particles at a much  
414 larger amount if compared with lymphocytes. The unexpected colocalisation of CD14  
415 membrane receptor and VLPs, as well as the morphological changes observed, suggest that  
416 monocytes respond to this interaction as immune cells, in order to eliminate invading  
417 microorganisms. CD14 is a 53-kDa molecule, expressed mainly in monocytes,  
418 macrophages and granulocytes. It is also found as soluble protein in the serum (42). One  
419 known function of this receptor is to bind the complex of LPS (bacterial  
420 lipopolysaccharide). Macrophages expressing CD14 can respond to very small amounts of  
421 LPS, and this interaction is required for activation of these cells (43). Some studies suggest  
422 that the receptor CD16 (FcγRIII), present on the plasma membrane surface of neutrophils,  
423 can bind to VLPs at mice splenocytes' surface, indicating that this receptor has a role to  
424 play in immune response against viral capsid proteins (43, 44). It is necessary to clarify the  
425 actual mechanisms involved in the interactions between CD14, CD16 and VLPs, in order to  
426 better understand how the immune system can properly eliminate the HPV from the host.  
427 Tf is a beta globulin responsible for the transport of iron (Fe), through plasma, to the  
428 interior of cells. Besides hepatocytes, other cells in the body are able to synthesize it. The  
429 TfR is a membrane protein expressed primarily in T and B lymphocytes, macrophages, and  
430 proliferating cells such as homodimers with N-terminal cytoplasmic tails (42). TfR is

431 constantly being endocytosed by plasma membrane through clathrin-mediated endocytosis,  
432 with the purpose of carrying ferric iron bound to Tf to the inside of cells. This Tf-TfR  
433 complex is delivered to the early endosome into a lower pH medium, where iron is released  
434 and TfR is recycled to the cell's surface (45). When evaluating the interactions between  
435 HPV16 L1/L2 VLPs, HPV6, 11, 16, 18 L1 VLPs (Gardasil<sup>®</sup> vaccine) and unstructured  
436 HPV16 L1 in PBMCs and in the presence of exogenous Tf, we determined the  
437 colocalisation of L1-VLP-Tf and free Tf in these cells, as well as colocalisation with TfR,  
438 after 45 minutes of interaction. This colocalisation between VLP, Tf and TfR was found in  
439 approximately 50% of analysed cells. These results suggest that HPV16 L1/L2 VLPs,  
440 HPV6, 11, 16, 18 L1 VLPs (Gardasil<sup>®</sup> vaccine) and unstructured HPV16 L1 can enter cells  
441 by endocytosis through clathrin-dependent, via TfR. It is probable that, along viral infection  
442 processes, interactions between HPV16 (about 55 nm size) and Tf molecules (80-kDa)  
443 might indeed happen, through fusion with Fe-Tf-TfR complexes, mimicking its entry into  
444 the cell via low pH endosomes, thus enabling transcytosis (29, 46-49).

445 There have been no reports in the literature showing the internalisation of HPV VLPs in  
446 human PBMC. So far, this study has showed that PBMCs of healthy female volunteers  
447 were able to internalise HPV16 VLPs. Also, T and B Lymphocytes were the main cell  
448 types that further interacted with VLPs. It is important to emphasize that the lymphocytes  
449 are cells capable of dividing themselves and it is estimated that the half-life of these  
450 inactive cells in humans is of some years. Furthermore, inactive lymphocytes circulate  
451 continuously through the bloodstream and lymphatic vessels. Using different cell lineages  
452 with VLPs or PsV (pseudovirion), scientists have come to different conclusions. Our  
453 findings agree with the data obtained by other researchers who – through the use of PsV-  
454 infected HeLa and HaCaT cells – successfully demonstrated that the HPV entry is clathrin-

455 caveolin-cholesterol-and-dynamin-independent (7). The entry of HPV VLPs in leukocytes  
456 by independent endocytosis pathways may be due to their ability to recognise, capture and  
457 remove foreign substances from the body. The use of different biochemical inhibitors,  
458 isolated or associated, does not seem to be enough to block the internalisation of HPV16  
459 L1/L2 VLPs in the PBMC, suggesting that a specific receptor is not required to the uptake  
460 and HPV16 entry into the host cells. A recent study demonstrates that intrinsic risk factors  
461 are responsible of around 10%-30% of cancer development risk, and that the rates of  
462 endogenous mutation accumulation by intrinsic processes are not sufficient to account for  
463 the high cancer risks observed. Cancer risk in general is heavily influenced by extrinsic  
464 factors like HPV infection (50). Unravelling the molecular steps leading to virus entry into  
465 the cells may be important for the development of new strategies for the prevention of  
466 infection by HPV and foster immune response against important human pathogen.

467

## 468 **CONCLUSIONS**

469 HPV16 L1/L2 VLPs produced in this study interacted with *in vitro* HEK293T cells and *ex*  
470 *vivo* PBMC from healthy women volunteers, and were internalised. This study evinced that  
471 HPV16 L1/L2 VLPs can interact with the plasma membrane surface, and been uptake by  
472 lymphocytes. We also demonstrated that HPV16 L1/L2 VLPs might utilize the endocytic  
473 pathway of iron-mediated clathrin as a receptor, which involves multiple membrane  
474 receptors simultaneously and also the classical endocytic pathway of iron – the most  
475 widespread among vertebrates and the animal kingdom as a whole – we have demonstrated  
476 that HPV16 L1/L2 VLPs does not require a specific receptor in order to be internalised by  
477 leukocytes. Complementary studies are required to accurately demonstrate the probable  
478 mechanisms involved.

479

## 480 **ACKNOWLEDGEMENTS**

481 The authors would like to express their deepest gratitude to the CAPES Master's Degree  
482 Fellowship to V. Szulczewski and E.A. Kavati, from the Biotechnology Interunits  
483 Postgraduate Programme USP-IBU-IPT; PAP-SES-FUNDAP Fellowships to T.M. Hosoda;  
484 Financial Support: FAPESP – Process Number 2004/15122-5; Butantan Foundation and  
485 Butantan Institute; to the Prof Dr Richard B.S. Roden, from the Department of Pathology,  
486 Johns Hopkins University, Baltimore, MD, USA, which kindly provided us anti-L2  
487 antibody, and for useful comments on the manuscript.

488

## 489 **Ethical Committee**

490 This work was duly evaluated and approved by the Sao Joaquim Hospital, Real and  
491 Meritorious Portuguese Beneficence Association Ethical Committee on Human Research.  
492 Protocol number: 369-08.

493 This work is in full compliance with the National Biosafety Law (CTNBio) guidelines and  
494 the present study was approved by the Butantan Institute Institutional Biosafety Committee  
495 (CIBio) and CTNBio – Process Nr. 01200.004893/1997-93 – published in the Brazilian  
496 Official Gazette (DOU) on August 16, 2011.

497

## 498 **REFERENCES**

- 499 1. **zur Hausen H, Meinhof W, Scheiber W, Bornkamm GW.** 1974. Attempts to  
500 detect virus-specific DNA sequences in human tumors: I. Nucleic acid  
501 hybridizations with complementary RNA of human wart virus. *Int J Cancer* **13**:650-

- 502 656. (First negative attempt to find papillomavirus DNA in cancer of the cervix with  
503 labelled HPV DNA from plantar warts).
- 504 2. **zur Hausen H.** 1976. Condylomata acuminata and human genital cancer. *Cancer*  
505 *Res* **36**:794. (Hypothesis that papillomaviruses are involved in the etiology of cancer  
506 of cervix).
- 507 3. **Dürst M, Dzarlieva-Petruseyska RT, Boukamp P, Fusenig NE, Gissmann L.**  
508 1987. Molecular and cytogenetic analysis of immortalized human primary  
509 keratinocytes obtained after transfection with human papillomavirus type 16 DNA.  
510 *Oncogene* **1**:251-256.
- 511 4. **Viarisio D, Gissmann L, Tommasino M.** 2017. Human papillomaviruses and  
512 carcinogenesis: well-established and novel models. *Curr Opin Virol* **26**:56-62.
- 513 5. **Sanjosé S, Serrano B, Castellsagué X, Brotons M, Muñoz J, Bruni L, Bosch FX.**  
514 2012. Human papillomavirus (HPV) and related cancers in the Global Alliance for  
515 Vaccines and Immunization (GAVI) countries. AWHO/ICO HPV Information  
516 Centre Report. *Vaccine* **30S**:D1-D83.
- 517 6. **Day PM, Lowy DR, Schiller JT.** 2003. Papillomaviruses infect cells via a clathrin-  
518 dependent pathway. *Virology* **307**:1-11.
- 519 7. **Raff AB, Woodham AW, Raff LM, Skeate JG, Yan L, Da Silva DM, Schelhaas**  
520 **M, Kast WM.** 2013. The evolving field of human papillomavirus receptor research:  
521 a review of binding and entry. *J Virol* **87**:6062-6072.
- 522 8. **Bousarghin L, Touzé A, Combita-Rojas AL, Coursaget P.** 2003. Positively  
523 charged sequences of human papillomavirus type 16 capsid proteins are sufficient to  
524 mediate gene transfer into target cells via the heparan sulfate receptor. *J Gen Virol*  
525 **84**:157-164.

- 526 9. **Hindmarsh PL, Laimins LA.** 2007. Mechanisms regulating expression of the HPV  
527 31 L1 and L2 capsid proteins and pseudovirion entry. *Virology* **4**:1-12.
- 528 10. **Bosch FX, Broker TR, Forman D, Moscicki AB, Gillison ML, Doorbar J, Stern**  
529 **PL, Stanley M, Arbyn M, Poljak M, Cuzick J, Castle PE, Schiller JT,**  
530 **Markowitz LE, Fisher WA, Canfell K, Denny LA, Franco EL, Steben M, Kane**  
531 **MA, Schiffman M, Meijer CJ, Sankaranarayanan R, Castellsagué X, Kim JJ,**  
532 **Brotans M, Alemany L, Albero G, Diaz M, Sanjosé S.** 2013. Authors of ICO  
533 Monograph Comprehensive Control of HPV Infections and Related Diseases.  
534 Vaccine **31**:H1-31. Collaborators (98)
- 535 11. **Alemany L, Saunier M, Alvarado I, Quirós B, Salmeron J, Shin HR, Pirog E,**  
536 **Guimerà N, Hernández GA, Felix A, Clavero O, Lloveras B, Kasamatsu E,**  
537 **Goodman MT, Hernandez BY, Laco J, Tinoco L, Geraets DT, Lynch CF,**  
538 **Mandys V, Poljak M, Jach R, Verge J, Clavel C, Ndiaye C, Klaustermeier J,**  
539 **Cubilla A, Castellsagué X, Bravo IG, Pawlita M, Quint W, Muñoz N, Bosch FX,**  
540 **Sanjosé S on behalf of the HPV VVAP study group.** 2015. HPV DNA prevalence  
541 and type distribution in anal carcinomas worldwide. *Int J Cancer* **136**:98-107.
- 542 12. **Kavati EA, Palumbo ACM, Andrade FB, Marigliani B, Sakauchi D, Leão E,**  
543 **Armbruster-Moraes E, Müller M, Cianciarullo AM.** 2012. Interaction of  
544 HPV16L1L2 VLP with stem cells CD34+/CD117+ of the human amniotic fluid. In:  
545 Current microscopy contributions to advances in science and technology. Editor:  
546 Antonio Méndez-Vilas. Publisher: Formatex Research Center, Badajoz, Spain.  
547 Volume **5**:617-624. ISBN-13: 978-84-939843-5-9.  
548 <http://www.formatex.info/microscopy5/book/617-624.pdf>

- 549       13. **Dunne EF, Markowitz LE, Saraiya M, Stokley S, Middleman A, Unger ER,**  
550           **Williams A, Iskander J.** 2014. Centers for Disease Control and Prevention. CDC  
551           Grand Rounds: Reducing the Burden of HPV-Associated Cancer and Disease.  
552           MMWR **63**:69-72.
- 553       14. **Cianciarullo AM, Szulczewski V, Chaves AAM, Bazan SB, Aires KA, Müller M,**  
554           **Armbruster-Moraes E.** 2010. Production of HPV16 L1L2 VLPs in cultures of  
555           human epithelial cells. In: Microscopy: Science, Technology, Applications and  
556           Education. Editors: Antonio Méndez-Vilas and Jesús Díaz Álvarez. Publisher:  
557           Formatex Research Center, Badajoz, Spain. Volume **4**:1073-1082. ISBN- 13: 978-  
558           84-614-6190. <http://www.formatex.info/microscopy4/1073-1082.pdf>
- 559       15. **Marigliani B, Kavati EA, Sakauchi D, Oliveira HB, Canali RA, Sasaki AA,**  
560           **Ferreira Jr JMC, Armbruster-Moraes E, Müller M, Cianciarullo AM.** 2012.  
561           Intracellular distribution of recombinant Human Papillomavirus capsid proteins. In:  
562           Current microscopy contributions to advances in science and technology. Editor:  
563           Antonio Méndez-Vilas. Publisher: Formatex Research Center, Badajoz, Spain.  
564           Volume **5**:678-684. ISBN-13: 978-84-939843-5-9.  
565           <http://www.formatex.info/microscopy5/book/678-684.pdf>
- 566       16. **Nonnenmacher B, Breitenbach V, Villa LL, Prolla JC, Bozzetti MC.** 2002.  
567           Genital human papillomavirus infection identification by molecular biology among  
568           asymptomatic women. Rev Saude Publica **36**:95-100.
- 569       17. **Kavati EA, Hosoda TM, Szulczewski V, Leão E, Borelli P, Cianciarullo AM.**  
570           2017. A simple, fast, inexpensive and efficient method for leukocytes separation  
571           with preservation of morphology and cell viability for use in education and research.  
572           In: Microscopy and imaging science: practical approaches to applied research and



- 573 education. Editor: Antonio Méndez-Vilas. Publisher: Formatex Research Center,  
574 Badajoz, Spain. Volume 7:665-670. ISBN-13: 978-84-942134-9-6.  
575 <http://www.microscopy7.org/book/665-670.pdf>
- 576 18. **Fothergill T, Mcmillan NAJ.** 2006. Papillomavirus virus-like particles activate the  
577 PI3-kinase pathway via alpha-6 beta-4 integrin upon binding. *J Virol* **352**:319-328.
- 578 19. **Van Hamme E, Dewerchin HL, Cornelissen E, Verhasselt B, Nauwynck HJ.**  
579 2008. Clathrin- and caveolae-independent entry of feline infectious peritonitis virus  
580 in monocytes depends on dynamin. *J Gen Virol* **89**:2147-2156.
- 581 20. **Doorbar J, Egawa N, Griffin H, Kranjec C, Murakami I.** 2015. Human  
582 papillomavirus molecular biology and disease association. *Rev Med Virol* **25**:2-23.
- 583 21. **Schellenbacher C, Roden RBS, Kimbauer R.** 2017. Developments in L2-based  
584 human papillomavirus (HPV) vaccines. *Virus Res* **231**:166-175.
- 585 22. **Näsman A, Nordfors C, Holzhauser S, Vlastos A, Tertipis N, Hammar U,**  
586 **Hammarstedt-Nordenvall L, Marklund L, Munck-Wikland E, Ramqvist T,**  
587 **Bottai M, Dalianis T.** 2015. Incidence of human papillomavirus positive tonsillar  
588 and base of tongue carcinoma: a stabilisation of an epidemic of viral induced  
589 carcinoma? *Eur J Cancer* **51**:55-61.
- 590 23. **Frega A, Cenci M, Stentella P, Cipriano L, De Ioris A, Alderisio M, Vecchione**  
591 **A.** 2003. Human papillomavirus in virgins and behaviour at risk. *Cancer Lett* **194**:  
592 21-24.
- 593 24. **Armbruster-Moraes E, Ioshimoto LM, Leão E, Zugaib M.** 1994. Presence of  
594 human papillomavirus DNA in amniotic fluids of pregnant women with cervical  
595 lesions. *Gynecol Oncol* **54**:152–158.

- 596        25. **Rombaldi RL, Serafini EP, Mandelli J, Zimmermann E, Losquiavo KP.** 2008.  
597            Transplacental transmission of human papillomavirus. *Viol J* **5**:106.
- 598        26. **Sarkola ME, Grénman SE, Rintala MA, Syrjänen KJ, Syrjänen SM.** 2008.  
599            Human papillomavirus in the placenta and umbilical cord blood. *Acta Obstet*  
600            *Gynecol Scand* **87**:1181-1188.
- 601        27. **Koskimaa HM, Waterboer T, Pawlita M, Grénman S, Syrjänen K, Syrjänen S.**  
602            2012. Human papillomavirus genotypes present in the oral mucosa of newborns and  
603            their concordance with maternal cervical human papillomavirus genotypes. *J Pediatr*  
604            **160**:837-843.
- 605        28. **Gruenberg J, van der Goot FG.** 2006. Mechanisms of pathogen entry through the  
606            endosomal compartments. *Nat Rev Mol Cell Biol* **7**:495-504.
- 607        29. **Kinlock BL, Wang Y, Turner TM, Wang C, Liu B.** 2014. Transcytosis of HIV-1  
608            through vaginal epithelial cells is dependent on trafficking to the endocytic recycling  
609            pathway. *PLoS ONE* **9**:e96760.
- 610        30. **Müller M.** 2005. Human Papilloma Viruses: Methods and Protocols. Humana Press  
611            Inc. In: Davy, C.; Doorbar, J. *Methods in Molecular Medicine*. Totowa, NJ.  
612            **119**:435-446.
- 613        31. **Müller M, Gissmann L, Cristiano RJ, Sun XY, Frazer IH, Jenson AB, Alonso**  
614            **A, Zentgraf H, Zhou J.** 1995. Papillomavirus capsid binding and uptake by cells  
615            from different tissues and species. *J Virol* **69**:948-954.
- 616        32. **Roden RB, Kirnbauer R, Jenson AB, Lowy DR, Schiller JT.** 1994a. Interaction  
617            of papillomaviruses with the cell surface. *J Virol* **68**:7260-7266.
- 618        33. **Kieback E, Müller M.** 2006. Factors influencing subcellular localization of the  
619            human papillomavirus L2 minor structural protein. *Virology* **345**:199-208.

- 620 34. **Leder C, Kleinschmidt JA, Wiethe C, Müller M.** 2001. Enhancement of Capsid  
621 Gene Expression: Preparing the Human Papillomavirus Type 16 Major Structural  
622 Gene L1. *J Virol* **75**:9201-9209.
- 623 35. **Campo MS, Jarrett WF, Barron R, O'Neil BW, Smith KT.** 1992. Association of  
624 bovine papillomavirus type 2 and bracken fern with bladder cancer in cattle. *Cancer*  
625 *Res* **52**:6898-6904.
- 626 36. **Stocco dos Santos RC, Lindsey CJ, Ferraz OP, Pinto JR, Mirandola RS, Benese**  
627 **FJ, Birgel EH, Bragança-Pereira CA, Beçak W.** 1998. Bovine papillomavirus  
628 transmission and chromosomal aberrations: an experimental model. *J Gen Virol*  
629 **79**:2127-2135.
- 630 37. **Tseng CJ, Lin CY, Wang RL, Chen LJ, Chang YL, Hsieh TT, Pao CC.** 1992.  
631 Possible transplacental transmission of human papillomaviruses. *Am. J. Obstet*  
632 *Gynecol* **166**:35-40.
- 633 38. **Payne D, Tyring SK, Doherty MG, Daya D, Chan TS.** 1993. Detection of human  
634 papillomavirus type 16 in plasma cells. *Gynecol Oncol* **48**:406-412.
- 635 39. **Pao CC, Lin SS, Lin CY, Maa JS, Lai CH, Hsieh TT.** 1991. Identification of  
636 human papillomavirus DNA sequences in peripheral blood mononuclear cells. *Am J*  
637 *Clin Pathol* **95**:540-546.
- 638 40. **Karas Z, Porebas E.** 1998. HPV sequences in blood of patients with condyloma  
639 acuminata. *J Invest Dermatol* **110**:843-844.
- 640 41. **Roden RB, Weissinger EM, Henderson DW, Booy F, Kirnbauer R, Mushinski**  
641 **JF, Lowy DR, Schiller JT.** 1994b. Neutralization of bovine papillomavirus by  
642 antibodies to L1 and L2 capsid proteins. *J Virol* **68**:7570-7574.

- 643 42. **Abbas AK, Lichtman AH.** 2005. Cellular and Molecular Immunology. 5 ed.  
644 Philadelphia: Elsevier, 580 p.
- 645 43. **Da Silva DM, Velders MP, Nieland JD, Schiller JT, Nickoloff BJ, Kast WM.**  
646 2001. Physical interaction of human papillomavirus virus-like particles with immune  
647 cells. *Int Immunol* **13**:633-641.
- 648 44. **Da Silva DM, Fausch SC, Verbeek JS, Kast WM.** 2007. Uptake of human  
649 papillomavirus virus-like particles by dendritic cells is mediated by Fc gamma  
650 receptors and contributes to acquisition of T cell immunity. *J Immunol* **178**:7587-97.
- 651 45. **Trowbridge IS, Omary MB.** 1981. Human cell surface glycoprotein related to cell  
652 proliferation is the receptor for transferrin. *Proc Natl Acad Sci USA* **78**:3039–3043.
- 653 46. **Tuma PL, Hubbard AL.** 2003. Transcytosis: crossing cellular barriers. *Physiol Rev*  
654 **83**:871-932.
- 655 47. **Kinlock BL, Wang Y, Turner TM, Wang C, Liu B.** 2014. Transcytosis of HIV-1  
656 through vaginal epithelial cells is dependent on trafficking to the endocytic recycling  
657 pathway. *PLoS One* **9**:e96760.
- 658 48. **Anderson DJ.** 2014. Modeling mucosal cell-associated HIV type 1 transmission in  
659 vitro. *J Infect Dis* **210**:S648-S653.
- 660 49. **Sakajiri T, Yamamura T, Kikuchi T, Yajima H.** 2009. Computational structure  
661 models of apo and diferric transferrin-transferrin receptor complexes. *Protein J*  
662 **28**:407-414.
- 663 50. **Wu S, Powers S, Zhu W, Hannun YA.** 2016. Substantial contribution of extrinsic  
664 risk factors to cancer development. *Nature* **529**:43-47.

665  
666

667 **Figure Legends**

668 **Figure 1:** Interactions of human leukocytes with VLPs of HPV16, detected by indirect  
669 immunofluorescence. The leukocyte cells were incubated with the VLPs for 4 h. Following  
670 fixation, they were immunostained with anti-HPV16 L1 antibody and then stained with a  
671 secondary antibody conjugated to FITC (green). In all assays, AlexaFluor<sup>®</sup> 594-conjugated  
672 Phalloidin (red) detected the actin cytoskeleton. The internalisation of VLPs (green arrows)  
673 is shown in image C, through the sweep cuts on the Z-axis (C) 9.50 µm thick sections and  
674 each section to 1.60 µm. CLSM Zeiss LSM 510 Meta. Magnification: Objective C-  
675 Apochromatic 63xs /1.4 oil. Bar = 5 µm.

676

677 **Figure 2:** Interactions of human leukocytes with VLPs of HPV16, detected by indirect  
678 immunofluorescence. The leukocyte cells were incubated with the VLPs for 4 h. Following  
679 fixation, they were immunostained with the conformational anti-HPV16 VLPs and stained  
680 with a secondary antibody conjugated to FITC (green). AlexaFluor<sup>®</sup> 594-conjugated  
681 Phalloidin (red) detected the actin cytoskeleton. The internalisation of VLPs (green arrows)  
682 is shown in image C, through Z-axis sweep cuts (C) 7.80 µm thick sections and each  
683 section to 1.30 µm. In (A) we see a structure similar to an endocytic vesicle (white arrow).  
684 CLSM Zeiss LSM 510 Meta. Magnification: Objective C-Apochromatic 63xs /1.4 oil. Bar  
685 = 5 µm.

686

687 **Figure 3:** Interactions of human leukocytes with VLPs of HPV16, detected by indirect  
688 immunofluorescence. After fixation, cells were immunostained with anti-HPV16 L1  
689 antibody and then stained with a secondary antibody conjugated to FITC (green). Then  
690 immunostained with anti-HPV16 L2 antibody and revealed by AlexaFluor<sup>®</sup>555 secondary

691 antibody (red). The internalisation of VLPs (yellow arrows) is shown in confocal images  
692 (merge). In (B) structures similar to vacuoles (blue arrow) might be observed. CLSM Zeiss  
693 LSM 510 Meta. Magnification: Objective C-Apochromatic 63xs /1.4 oil. Bar = 5 µm.

694

695 **Figure 4:** Identification of human leukocyte interactions with the HPV16 VLPs analysed  
696 by indirect immunofluorescence. After fixation, cells were immunostained with the  
697 conformational anti-HPV16 VLPs and revealed by a secondary antibody conjugated to  
698 FITC (green). Then, the cells were treated with anti-CD04 (A) and anti-CD08 (B) and  
699 stained with a secondary antibody AlexaFluor<sup>®</sup>546 (red). VLP internalisation (green  
700 arrows) is visible on image overlay (merged images). In (B), a structure similar to an  
701 endocytic vesicle is detectable (white arrow). CLSM Zeiss LSM 510 Meta. Magnification:  
702 Objective C-Apochromatic 63xs /1.4 oil. Bar = 5 µm.

703

704 **Figure 5:** Identification of human leukocyte interactions with the HPV16 VLPs, analysed  
705 by indirect immunofluorescence. After fixation, cells were immunostained with the  
706 conformational anti-HPV16 VLPs and revealed by a secondary antibody conjugated to  
707 FITC (green). Then, the cells were treated with anti-CD20 and anti-CD14 and stained with  
708 a secondary antibody AlexaFluor<sup>®</sup>546 (red). VLP internalisation (green arrows) is visible  
709 on image overlay (merged images). In (B) we can observe the colocalisation of CD14 and  
710 VLPs (orange arrow) and vacuole-like structures (blue arrow). CLSM Zeiss LSM 510  
711 Meta. Magnification: Objective C-Apochromatic 63xs /1.4 oil. Bar = 5 µm.

712

713 **Figure 6:** Identification of human leukocyte interactions with the HPV16 VLPs analysed  
714 by indirect immunofluorescence. After fixation, cells were immunostained with the

715 conformational anti-HPV16 VLPs and revealed by a secondary antibody conjugated to  
716 FITC (green). Then, the cells were treated with anti-CD20 (C), anti-CD04 (A), anti-CD08  
717 (B), anti-CD14 (D) and AlexaFluor<sup>®</sup> 546 revealed by secondary antibody (red). VLP  
718 internalisation (green arrows) is shown in the images through Z-axis sweep cuts. (A) 9.25  
719  $\mu\text{m}$  of thick sections and each section of 0.84  $\mu\text{m}$ ; (B) 8.56  $\mu\text{m}$  thick sections and each  
720 section with 0.95  $\mu\text{m}$ ; (C) 9.27  $\mu\text{m}$  thick sections and each section with 1.03  $\mu\text{m}$ ; (D) 10,94  
721  $\mu\text{m}$  thick sections and each section having 1.40  $\mu\text{m}$ . CLSM Zeiss LSM 510 Meta.  
722 Magnification: Objective C-Apochromatic 63xs /1.4 oil.

723

724 **Figure 7:** Colocalisation of VLPs of HPV16 and Tf in human leukocytes, detected by  
725 indirect immunofluorescence. The leukocyte cells were incubated with the VLPs and the  
726 conjugated Tf TexasRed<sup>®</sup> (red). Leukocytes were treated with anti-HPV16 L1 antibody,  
727 revealed by a secondary antibody conjugated to FITC (green). In confocality (merge), the  
728 images reveal colocalisation of L1 and Tf (yellow arrows). CLSM Zeiss LSM 510 Meta.  
729 Magnification: Objective C-Apochromatic 63xs /1.4 oil. Bar = 5  $\mu\text{m}$ .

730

731 **Figure 8:** Colocalisation of HPV16 VLPs and Tf in human white blood cells, detected by  
732 indirect immunofluorescence. The leukocyte cells were incubated with the VLPs and the  
733 conjugated Tf TexasRed<sup>®</sup> (red). Leukocytes were immunostained with anti-HPV16 VLP  
734 antibody and revealed by a secondary antibody conjugated to FITC (green). In confocality  
735 (merge), the images reveal colocalisation of VLPs and Tf (yellow arrows). CLSM Zeiss  
736 LSM 510 Meta. Magnification: Objective C-Apochromatic 63xs /1.4 oil. Bar = 5  $\mu\text{m}$ .

737

738 **Figure 9:** Three-dimensional imaging of leukocyte interactions with the VLPs produced in  
739 this study or the VLP vaccine Gardasil, Tf and TfR; detected by indirect  
740 immunofluorescence. The leukocyte cells were incubated with the VLPs and the conjugated  
741 Tf TexasRed<sup>®</sup> (red). After fixation, the leukocytes were immunostained with anti-HPV16  
742 VLP antibody and revealed by a secondary antibody, conjugated to FITC (green), then  
743 treated with anti-CD71 and revealed by AlexaFluor<sup>®</sup>633 (blue). (A) and (B) colocalisation  
744 Tf and TfR (purple arrow), (C) and (D) colocalisation VLP / Tf / TfR (white arrows), (E)  
745 and (F) weak colocalisation VLP / Tf (orange arrows). CLSM Zeiss LSM 510 Meta.  
746 Magnification: Objective C-Apochromatic 63xs /1.4 oil.

747

748 **Figure 10 (1-6):** Immunofluorescence assay detecting the HPV VLPs entry in PBMC, even  
749 in presence of specific biochemical inhibitors of ligand uptake: (1) Sodium azide; (2)  
750 Chlorpromazine; (3) Liquemin; (4) rCTB; (5) Filipin; (6) Nystatin. (a) shows the overlay  
751 (merge) of images detected by stain of L1 protein (green), L2 protein (red), nuclei (blue);  
752 (b) Z-axis showing L1 protein within cells; (c) Z-axis showing the entry of L2 protein in  
753 cells was not inhibited. CLSM Zeiss LSM 510 Meta. Magnification: Objective C-  
754 Apochromatic 63xs /1.4 oil. Bar = 5  $\mu$ m.

755

756 **Figure 11.** Assay performed with all inhibitors used in Fig.15 (1-6), in association. (a)  
757 Detection of L1 protein (green); (b) L2 protein within cells (red); (c) nuclei (blue); (d) the  
758 overlay (merge) of images (a, b and c); Z-axis showing the L1 (e) and L2 (f) proteins within  
759 cells. CLSM Zeiss LSM 510 Meta. Magnification: Objective C-Apochromatic 63xs /1.4 oil.  
760 Bar = 5  $\mu$ m.

761



762 **Illustrations**

763 **Table 1:** Biochemical inhibitors used to examine their effects on the entry of HPV VLPs in  
764 PBMC.

| Inhibitors                 | Inhibition                    |
|----------------------------|-------------------------------|
| Chlorpromazine             | Clathrin pathway              |
| rCTB (Clostridium toxin B) | Actin-dependent cells process |
| Filipin and Nystatin       | Caveolae pathway              |
| Liquemin                   | HSPG pathway                  |
| Sodium azide               | Endocytic pathways            |

765

766

767 **Table 2:** Interactions of HPV16 VLPs produced in this study with PMBC (mononuclear  
768 cells) from peripheral blood of healthy female volunteers.

| PMBC         | Receptor | Percentage of cells that interacted with VLPs <sup>1</sup> |
|--------------|----------|------------------------------------------------------------|
| Lymphocyte T | CD04     | 52% ± 3                                                    |
| Lymphocyte T | CD08     | 47% ± 2                                                    |
| Lymphocyte B | CD20     | 48% ± 3                                                    |
| Monocyte     | CD14     | 23% ± 5                                                    |

769

770 <sup>1</sup> The percentage of cells that interact with HPV16 VLPs was calculated by the number of  
771 cells recognized by anti-CD antibodies, which have internalized the particles. The result  
772 corresponds to the analysis in duplicate, being representative of at least four trials.

773

774 **Figure 1**

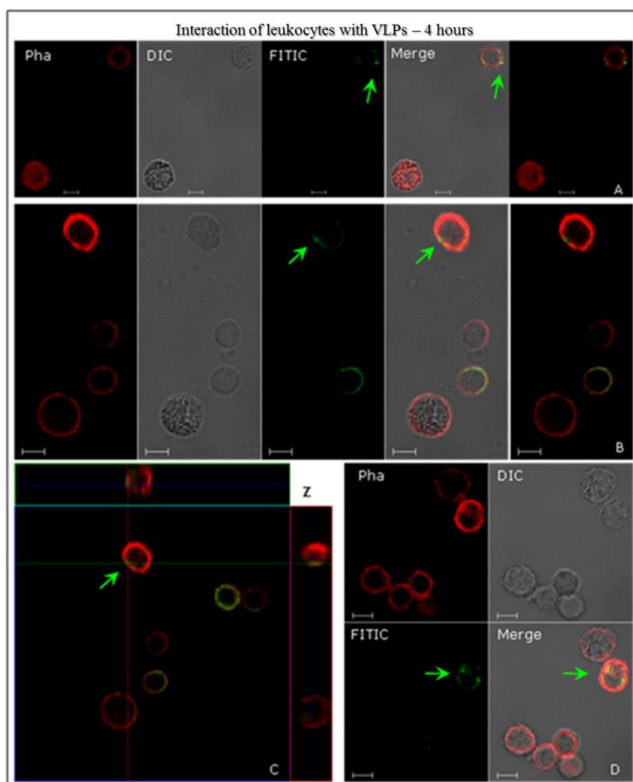

775

776

777 **Figure 2**

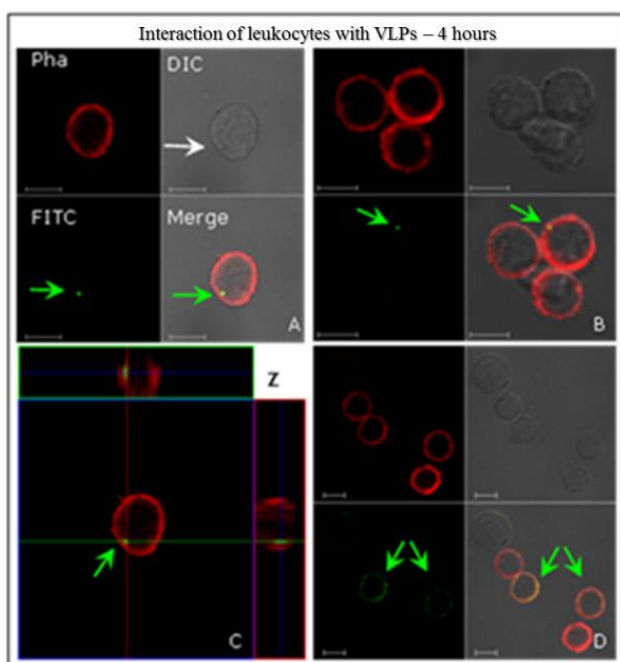

778

779 **Figure 3**

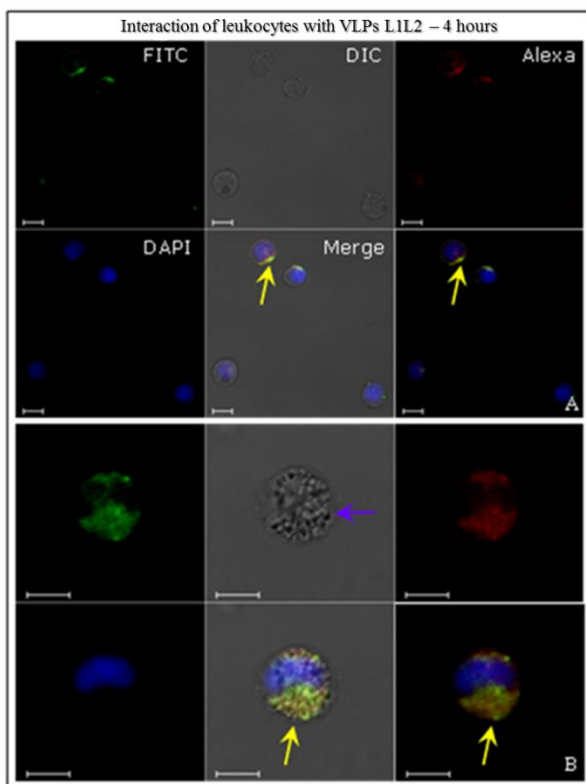

780

781 **Figure 4**

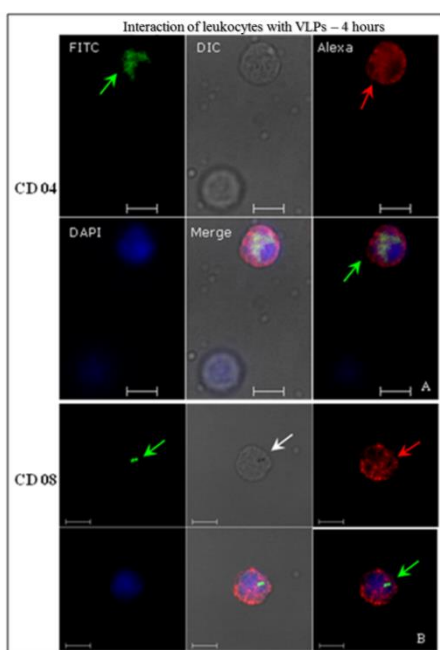

782

783 **Figure 5**

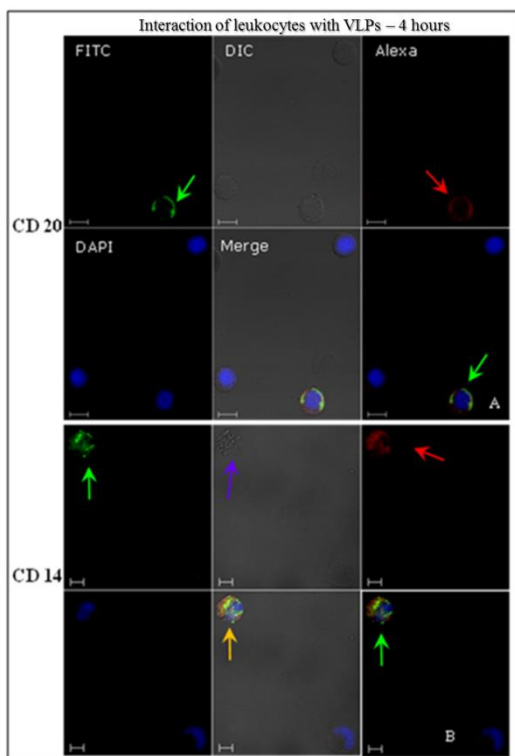

784

785 **Figure 6**

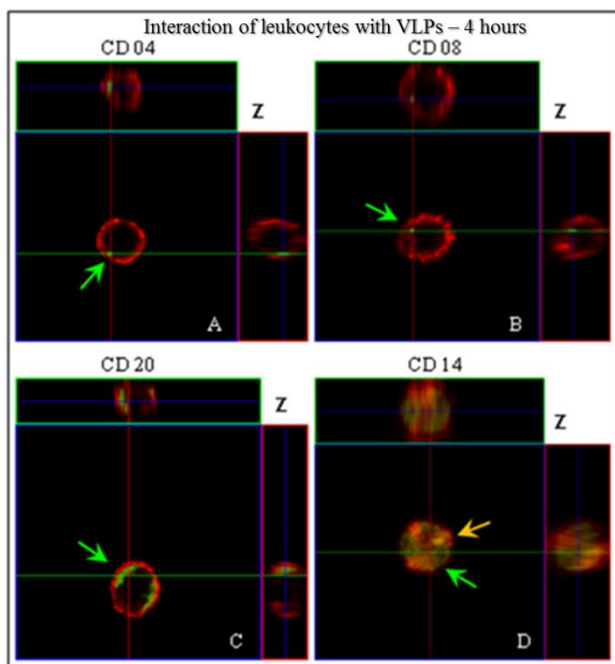

786

787 **Figure 7**

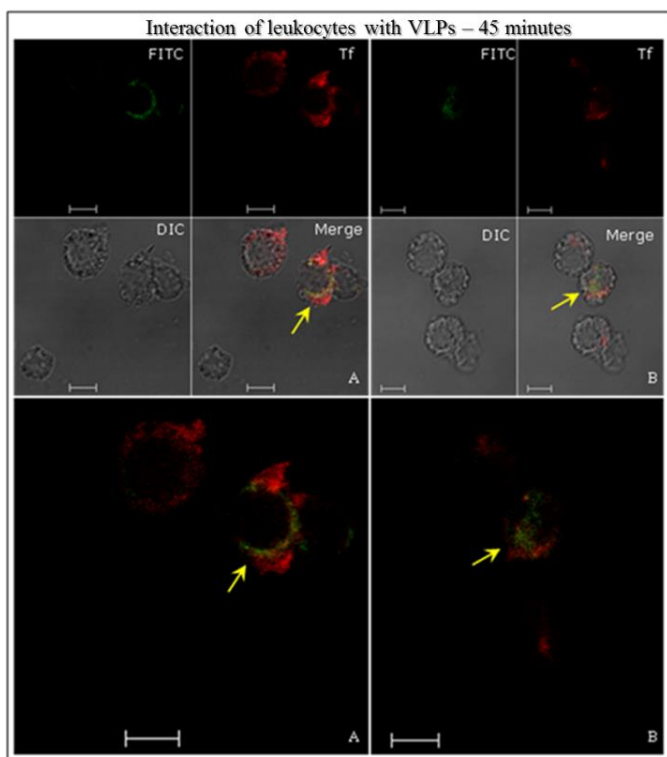

788

789 **Figure 8**

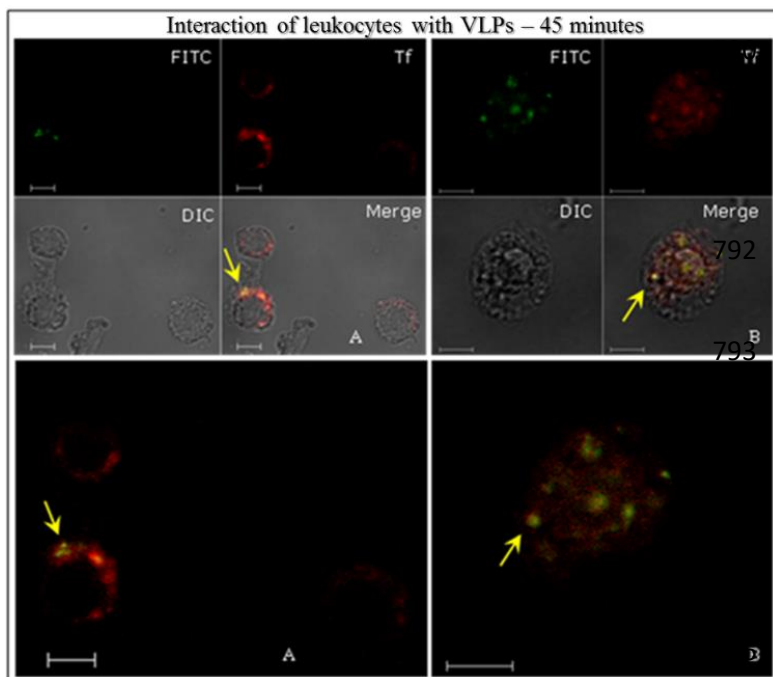

797 **Figure 9**

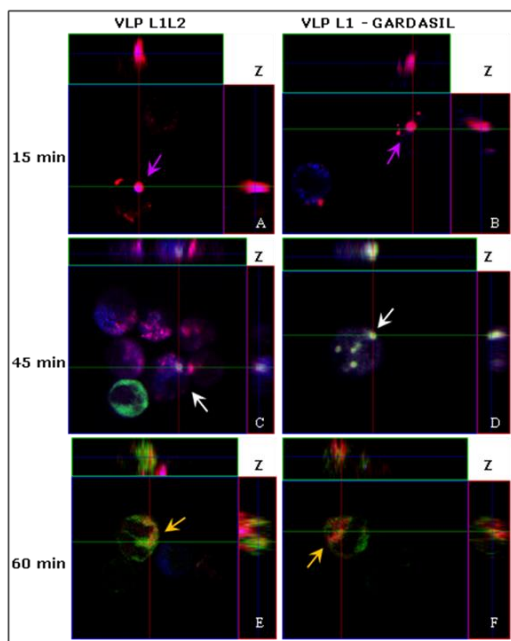

798

799 **Figure 10**

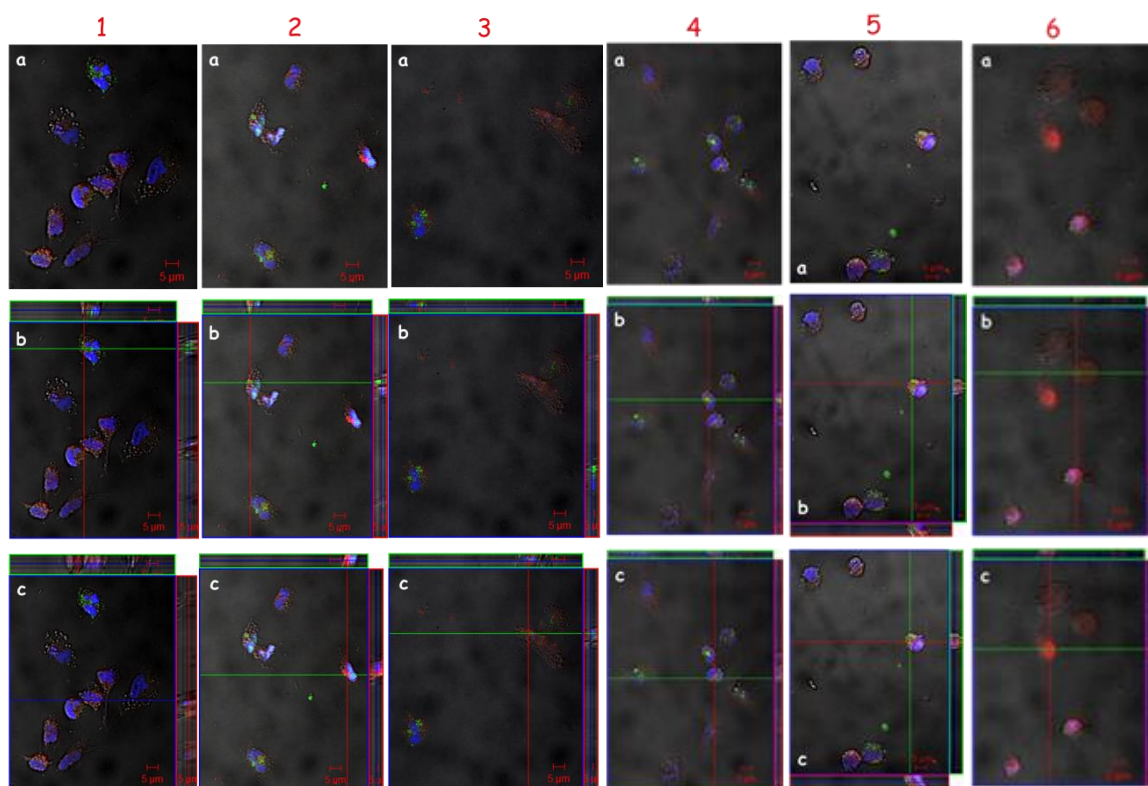

800

801 **Figure 11**

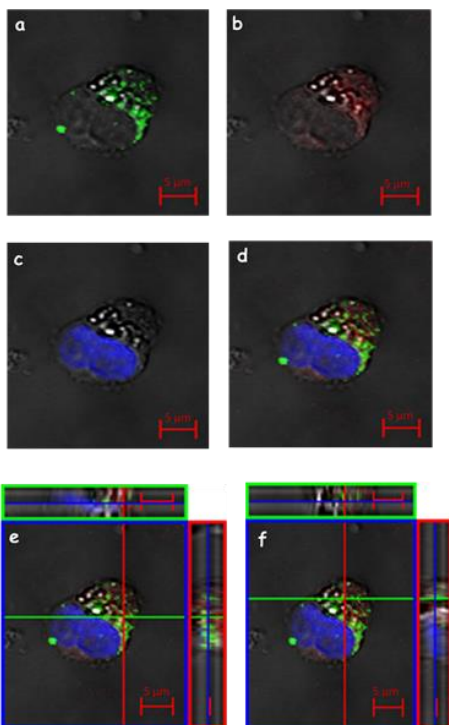

802

803

804

805

806

807

808

809

810

811

812

813

814

815

816

817 **Supplemental Material (Figures S1-S5 and Illustrations S6-S7)**

818 **Image 1 – S1**

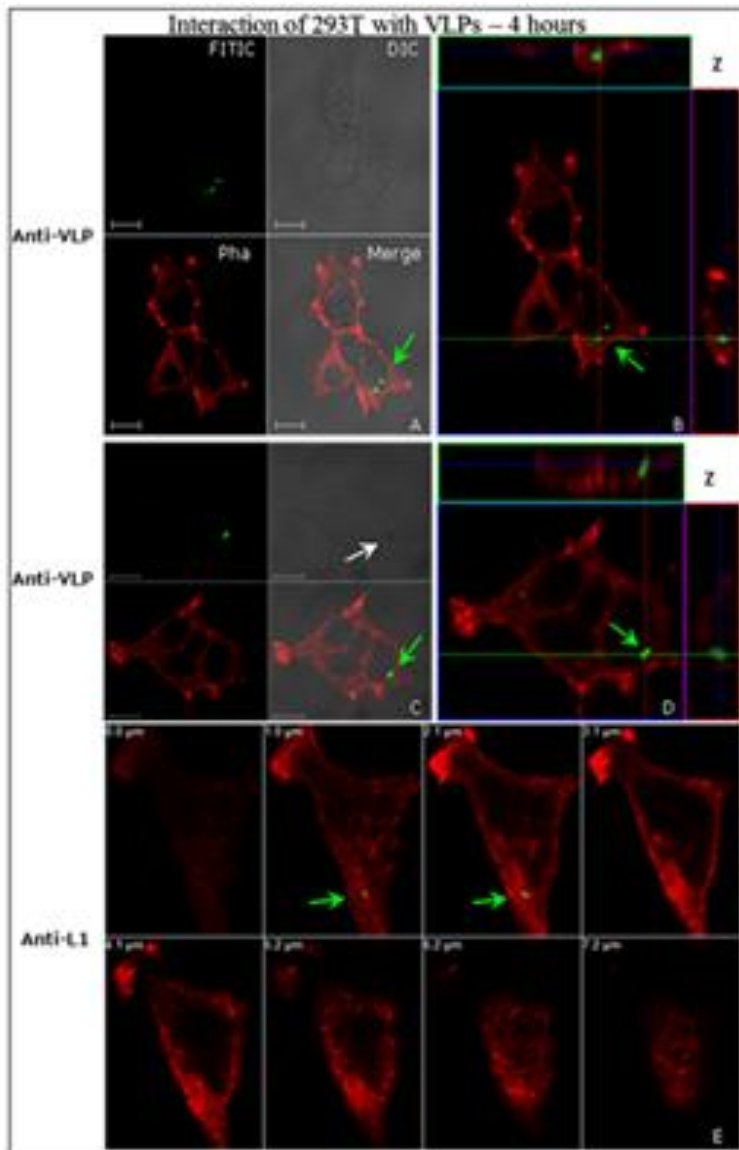

820 **Image 1 – S1:** Interaction of non-transfected HEK293T cell line with VLPs of HPV16,  
821 detected by indirect immunofluorescence. Cells were incubated with the VLPs for 4 h,  
822 fixed with 2% PFA in PBS. In (E) cells were immunostained with anti-L1 antibody and in  
823 (A), (B), (C) and (D) anti-VLP conformational antibody, for both HPV16 and developed  
824 with secondary antibody conjugated to FITC (green). Phalloidin detected the actin



825 cytoskeleton with AlexaFluor 594 conjugate (red). The internalisation of VLPs (green  
826 arrows) are shown in B and D images, and L1 in E, sweep cuts through the Z axis (B) of  
827 11.38  $\mu\text{m}$  thick sections, and each section with 1.03  $\mu\text{m}$ ; (D) 9.67  $\mu\text{m}$  thick sections and  
828 each section having 1.61  $\mu\text{m}$ . In (C), there was a similar structure to an endocytic vesicle  
829 (white arrow). CLSM Zeiss LSM 510 Meta. Magnification: Objective C-Apochromatic  
830 63xs /1.4 oil. Bar = 10  $\mu\text{m}$ .

831

### 832 **Image 2 – S2**

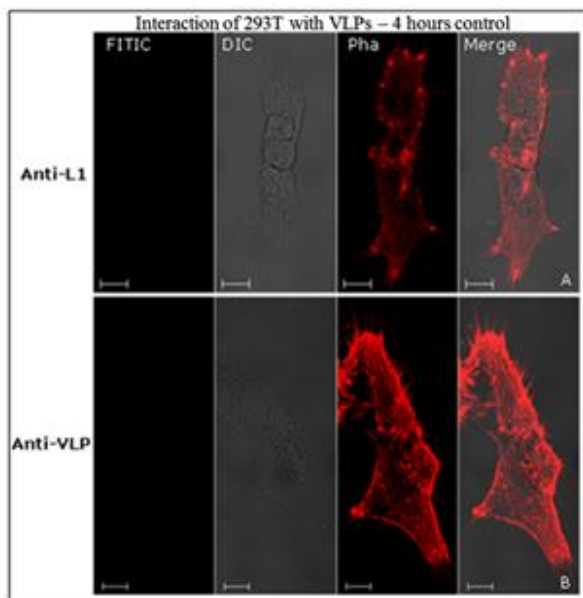

833

834 **Image 2 S2:** Assays-control of the interactions among HEK293T cells non-transfected,  
835 with the HPV16 VLPs detected by immunofluorescence. In (A) cells were treated with anti-  
836 L1 antibody and (B) with anti-VLP conformational, for both HPV16 and developed with  
837 secondary antibody conjugated to FITC (green). AlexaFluor® 594-conjugated Phalloidin  
838 (red) detected the actin cytoskeleton. CLSM Zeiss LSM 510 Meta. Magnification:  
839 Objective C-Apochromatic 63xs /1.4 oil. Bar =10  $\mu\text{m}$ .

840 **Image 3 – S3**

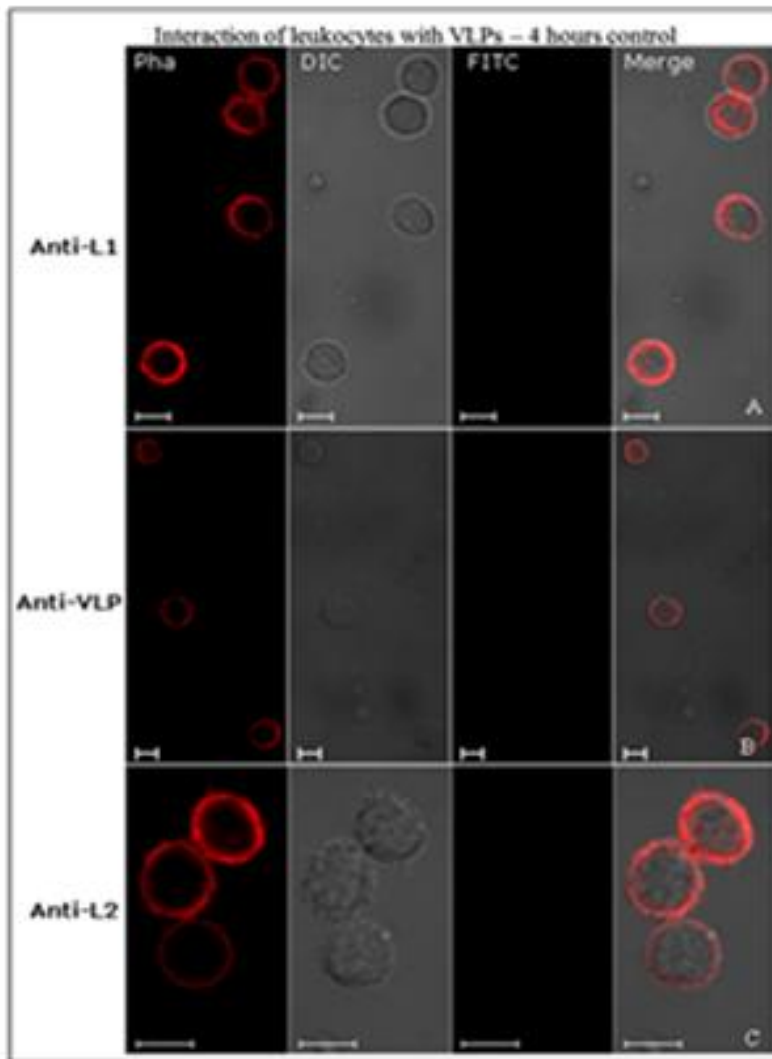

841

842 **Image 3 – S3:** Testing control the interactions of human leukocytes with VLPs of HPV16,  
843 detected by indirect immunofluorescence. In (A) the cells were treated with anti-L1 and (B)  
844 with anti-VLPs, HPV16 both to, and after, revealed by a secondary antibody conjugated to  
845 FITC (green). In (C) the cells were treated with anti-HPV16 L2, and after, AlexaFluor®488  
846 revealed by secondary antibody (green). AlexaFluor® 594-conjugated Phalloidin (red)  
847 detected the actin cytoskeleton. CLSM Zeiss LSM 510 Meta. Magnification: Objective C-  
848 Apochromatic 63xs /1.4 oil. Bar = 5  $\mu$ m.

849 **Image 4 – S4**

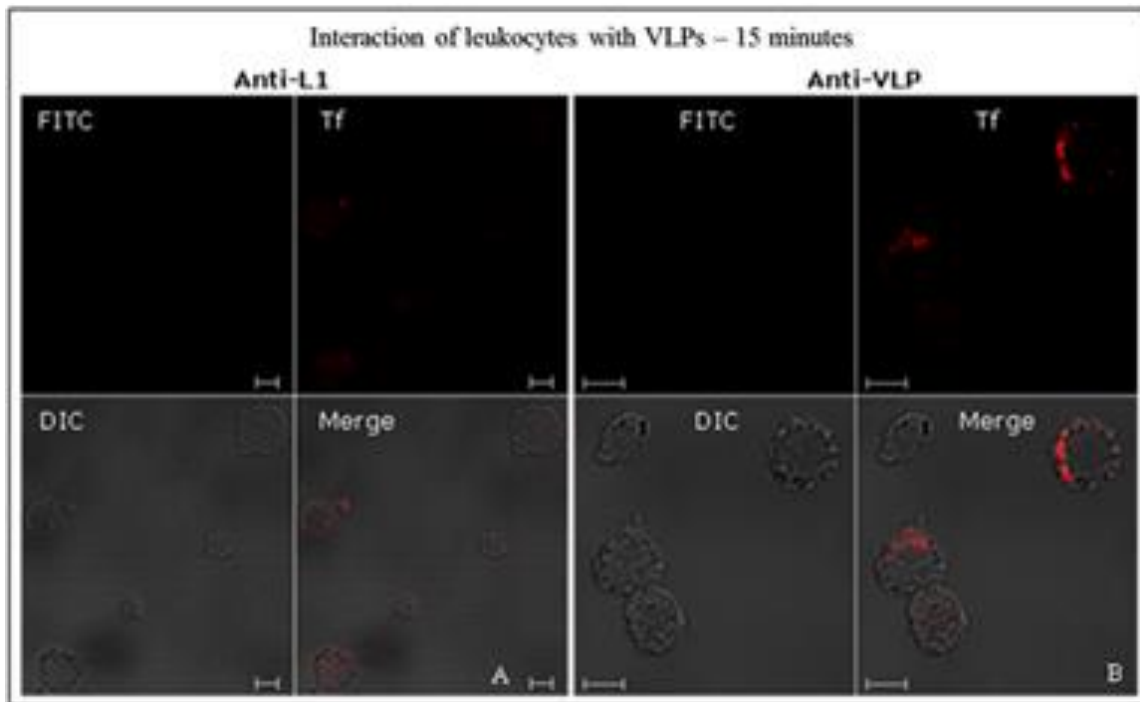

850

851 **Image 4 S4:** Detection of HPV16 VLPs and Tf human leukocytes by indirect

852 immunofluorescence. The leukocyte cells were incubated with the VLPs and Tf protein

853 conjugated TexasRed® (red). In (A) the cells were immunostained with anti-L1 antibody

854 and (B) with anti-VLP conformational both to HPV16, revealed by a secondary antibody

855 conjugated to FITC (green). By confocality (merge) of the images is not possible to observe

856 colocalization and VLPs entry in leukocytes. CLSM Zeiss LSM 510 Meta. Magnification:

857 Objective C-Apochromatic 63xs /1.4 oil. Bar = 5 µm.

858

859

860

861

862

863 **Image 5 – S5**

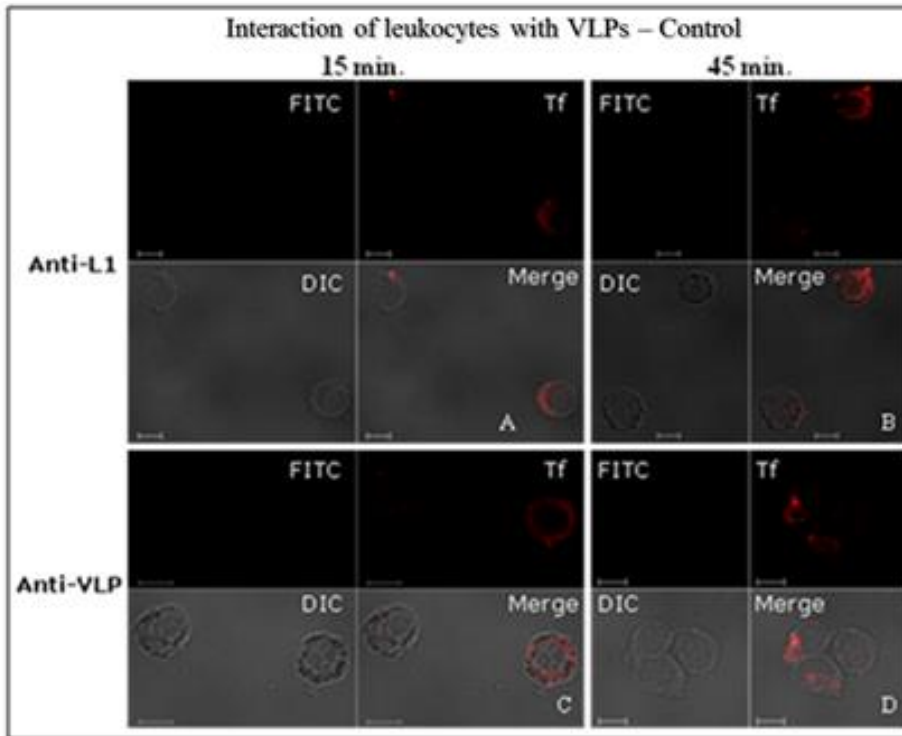

865 **Image 5 - S5:** Images of the negative control testing of VLPs of HPV16 and Tf interactions  
866 in human leukocytes analysed by indirect immunofluorescence. The leukocyte cells were  
867 incubated with Tf conjugated TexasRed® (red) VLPs in the absence (A and C) and / or  
868 denatured VLPs (B and D). In (A) and (C) the leukocytes were treated with anti-L1  
869 antibody and (B) and (D) anti-VLPs, HPV16 both revealed by a secondary antibody  
870 conjugated to FITC (green). Overlay (merge) of images that show no immunostaining signs  
871 by anti-L1 and anti-HPV16 VLPs. CLSM Zeiss LSM 510 Meta. Magnification: Objective  
872 C-Apochromatic 63xs /1.4 oil. Bar = 5 µm.

873

874

875

876

877 **Illustrations S6 – S7**

878 **S6 - Table 1:** List of primary antibodies used in immunocytochemistry reactions.

| Antibody                          | Dilution | Description                                                       | Supplier                            |
|-----------------------------------|----------|-------------------------------------------------------------------|-------------------------------------|
| <b>Anti-L1<br/>Camvir-1</b>       | 1:500    | anti-mouse IgG <sub>2a</sub> , specific for HPV16                 | BD Biosciences                      |
| <b>Anti-L1<br/>conformational</b> | 1:100    | anti-mouse IgG <sub>2a</sub> , specific for HPV16                 | Biodesign                           |
| <b>Anti-L2</b>                    | 1:100    | anti-rabbit IgG                                                   | Roden, R.<br>MD/USA                 |
| <b>Transferrin<br/>conjugated</b> | 1:60     | TexasRed <sup>®</sup> (Ex. 595 nm, Em. 615 nm)                    | Molecular Probes <sup>™</sup>       |
| <b>Anti-Tf</b>                    | 1:750    | anti- rabbit IgG                                                  | Dako                                |
| <b>Anti-Ferritin</b>              | 1:750    | anti- rabbit IgG                                                  | Dako                                |
| <b>Anti-CD71</b>                  | 1:750    | anti-mouse IgG <sub>1</sub> ; Tf receptor                         | Dako                                |
| <b>Anti-CD04</b>                  | 1:20     | anti-mouse IgG <sub>2a</sub> ; recognizes T lymphocytes “helper”  | CALTAG <sup>™</sup><br>Laboratories |
| <b>Anti-CD08</b>                  | 1:20     | anti-mouse IgG <sub>2a</sub> ; recognizes cytotoxic T lymphocytes | CALTAG <sup>™</sup><br>Laboratories |
| <b>Anti-CD14</b>                  | 1:20     | anti-mouse IgG <sub>2a</sub> ; recognizes monocytes               | CALTAG <sup>™</sup><br>Laboratories |
| <b>Anti-CD20</b>                  | 1:20     | anti-mouse IgG <sub>3</sub> ; recognizes B lymphocytes            | CALTAG <sup>™</sup><br>Laboratories |

879

880 **S7 - Table 2:** List of secondary antibodies used in immunocytochemistry reactions.

| Antibody                          | Dilution | Description                   | Ex/Em. (nm) | Supplier                      |
|-----------------------------------|----------|-------------------------------|-------------|-------------------------------|
| <b>FITC</b>                       | 1:250    | anti- mouse IgG <sub>2a</sub> | 495/519     | BD Biosciences                |
| <b>AlexaFluor<sup>®</sup> 546</b> | 1:500    | anti- mouse IgG               | 556/573     | Molecular Probes <sup>™</sup> |
| <b>AlexaFluor<sup>®</sup> 555</b> | 1:500    | anti- rabbit IgG              | 555/565     | Molecular Probes <sup>™</sup> |
| <b>AlexaFluor<sup>®</sup> 594</b> | 1:500    | anti- mouse IgG <sub>3</sub>  | 590/617     | Molecular Probes <sup>™</sup> |
| <b>AlexaFluor<sup>®</sup> 633</b> | 1:500    | anti- mouse IgG               | 632/647     | Molecular Probes <sup>™</sup> |
| <b>AlexaFluor<sup>®</sup> 633</b> | 1:500    | anti- rabbit IgG              | 632/647     | Molecular Probes <sup>™</sup> |

881
